# Supplementary material for: Factors Associated with Uptake of Intermittent Preventive Treatment of Malaria in Pregnancy: A Cross-Sectional Study in Private Health Facilities in Tema Metropolis, Ghana
Source: J Trop Med. 2019 Aug 1;2019:9278432. doi: 10.1155/2019/9278432 (PMC6699305; doi:10.1155/2019/9278432)
Supplement: Supplementary Materials — All data generated during the current study are included in this published article and its supplementary information file (additional file 1). Additional file 1: Data set1. [file 9278432.f1.xlsx]

## Sheet: Sheet1
id	rage	rage_group	mstat	edu	rocc	pocc	nkid	nkid_group	nkid_group2	gage	gage_weeks	preg	page	page_weeks	ndel	psp	utind	kmal	ktrans	lhb	sbef	matdef	lbwt	ksp	pksp	ntksp	kspfd	dksp	utind_group	nanc	nanc_group
17	25	25-31	1	2	1	2	0	0	<3	8	32-40	yes	na	na	0	1	na	0	0	0	0	0	0	0	0	0	0	0	0-2	10	>=8
38	19	18-24	1	1	2	0	0	0	<3	9	36-40	yes	na	na	0	1	na	0	0	0	1	1	1	0	1	1	1	1	3-4	10	>=8
40	22	18-24	1	0	2	1	0	0	<3	8	32-40	yes	na	na	0	1	na	0	0	0	0	0	0	0	0	0	0	0	3-4	8	>=8
41	23	18-24	1	2	2	2	0	0	<3	9	36-40	yes	na	na	0	1	na	0	0	0	1	0	1	0	0	0	1	1	0-2	9	>=8
44	27	25-31	1	1	1	1	0	0	<3	9	36-40	yes	na	na	0	1	na	1	0	0	1	0	1	1	1	1	1	1	3-4	1	<4
50	33	32-38	1	1	2	0	0	0	<3	9	36-40	yes	na	na	3	0	3	0	0	1	1	1	1	0	0	0	1	1	3-4	10	>=8
52	31	25-31	1	1	1	0	0	0	<3	8	32-40	yes	na	na	0	1	na	0	0	0	0	0	0	0	0	0	1	1	3-4	4	4-7
73	37	32-38	1	1	1	1	0	0	<3	8	32-40	yes	na	na	5	0	1	0	0	0	1	0	0	0	0	0	1	1	0-2	4	4-7
125	30	25-31	1	1	1	0	0	0	<3	9	36-40	yes	na	na	0	1	na	0	0	0	1	0	1	0	0	0	0	0	0-2	7	4-7
128	20	18-24	0	2	1	1	0	0	<3	8	32-40	yes	na	na	0	1	na	0	0	0	1	0	1	0	0	0	1	1	0-2	7	4-7
131	31	25-31	1	1	1	1	0	0	<3	8	32-40	yes	na	na	2	0	3	1	0	0	1	0	1	0	0	0	0	0	3-4	6	4-7
132	22	18-24	1	1	2	0	0	0	<3	9	36-40	yes	na	na	0	1	na	0	0	0	1	0	1	1	1	1	1	1	0-2	7	4-7
133	32	32-38	1	1	1	0	0	0	<3	8	32-40	yes	na	na	0	1	na	0	0	0	1	0	0	0	0	0	1	1	3-4	6	4-7
142	25	25-31	2	1	1	1	0	0	<3	8	32-40	yes	na	na	0	1	na	0	0	0	1	0	1	0	0	0	1	1	3-4	6	4-7
143	32	32-38	1	1	1	1	0	0	<3	9	36-40	yes	na	na	0	1	na	0	0	0	1	0	0	0	0	0	1	1	0-2	4	4-7
146	18	18-24	0	2	2	1	0	0	<3	8	32-40	yes	na	na	0	1	na	0	0	0	1	0	1	0	0	0	1	1	0-2	4	4-7
159	30	25-31	1	3	0	0	0	0	<3	8	32-40	yes	na	na	0	1	na	0	0	0	0	0	0	0	0	0	0	0	0-2	3	<4
186	21	18-24	2	2	0	1	0	0	<3	8	32-40	yes	na	na	0	1	na	0	0	0	0	0	0	0	0	0	0	0	3-4	3	<4
187	26	25-31	2	2	1	0	0	0	<3	8	32-40	yes	na	na	0	1	na	1	0	0	1	0	1	1	1	1	1	1	5-6	10	>=8
232	27	25-31	1	2	0	1	0	0	<3	9	36-40	yes	na	na	0	1	na	0	0	0	1	1	1	0	0	0	0	0	3-4	4	4-7
233	27	25-31	1	2	1	0	0	0	<3	9	36-40	yes	na	na	0	1	na	0	0	0	0	0	1	0	1	1	1	1	0-2	5	4-7
240	27	25-31	1	1	1	1	0	0	<3	8	32-40	yes	na	na	1	1	na	1	0	0	0	0	1	1	1	1	1	1	0-2	6	4-7
242	28	25-31	2	1	1	1	0	0	<3	9	36-40	yes	na	na	0	1	na	0	0	0	1	1	1	0	1	0	1	1	0-2	5	4-7
251	27	25-31	2	1	1	1	0	0	<3	8	32-40	yes	na	na	0	1	na	0	0	0	0	0	0	0	0	0	0	0	3-4	6	4-7
255	27	25-31	1	2	1	0	0	0	<3	8	32-40	yes	na	na	0	0	1	0	1	1	1	1	1	0	0	0	0	0	0-2	7	4-7
256	40	39-45	1	2	1	1	0	0	<3	8	32-40	yes	na	na	0	1	na	0	0	1	1	1	1	1	0	0	0	0	3-4	5	4-7
258	39	39-45	1	1	1	1	0	0	<3	8	32-40	yes	na	na	0	1	na	1	0	0	1	0	1	1	1	1	1	1	0-2	8	>=8
260	19	18-24	0	0	2	2	0	0	<3	9	36-40	yes	na	na	0	1	na	1	0	1	1	1	1	1	1	1	1	1	3-4	1	<4
264	18	18-24	0	1	2	0	0	0	<3	8	32-40	yes	na	na	0	0	2	0	0	0	0	0	0	1	1	1	1	1	0-2	7	4-7
278	28	25-31	1	1	1	0	0	0	<3	na	na	del	1	1-4	0	1	na	0	0	0	0	0	0	0	0	0	0	1	0-2	6	4-7
286	21	18-24	2	2	2	1	0	0	<3	8	32-40	yes	na	na	0	1	na	1	0	0	1	0	1	0	0	0	1	1	3-4	3	<4
289	27	25-31	1	1	1	1	0	0	<3	8	32-40	yes	na	na	0	0	3	99	0	0	0	0	0	0	0	0	0	1	3-4	6	4-7
295	32	32-38	1	1	1	0	0	0	<3	8	32-40	yes	na	na	0	1	na	0	0	0	1	0	1	0	0	0	1	1	0-2	8	>=8
299	25	25-31	1	1	2	1	0	0	<3	9	36-40	yes	na	na	0	1	na	0	0	0	0	0	0	1	1	1	1	1	3-4	2	<4
300	30	25-31	1	0	1	1	0	0	<3	8	32-40	yes	na	na	0	1	na	1	0	0	1	1	1	1	1	1	1	1	3-4	6	4-7
302	28	25-31	2	3	2	1	0	0	<3	9	36-40	yes	na	na	0	0	3	0	0	0	0	0	0	0	0	0	1	1	3-4	7	4-7
310	26	25-31	2	2	2	1	0	0	<3	8	32-40	yes	na	na	0	1	na	0	0	0	1	1	1	0	0	0	1	1	0-2	7	4-7
348	20	18-24	2	1	2	1	0	0	<3	8	32-40	yes	na	na		1	na	0	0	0	1	0	1	0	0	0	0	0	3-4	10	>=8
352	32	32-38	0	2	1	1	0	0	<3	9	36-40	yes	na	na	0	1	na	0	0	0	0	0	1	0	0	0	0	0	0-2	1	<4
353	32	32-38	0	2	1	0	0	0	<3	8	32-40	yes	na	na	0	1	na	0	0	0	0	0	0	0	1	0	1	1	0-2	3	<4
378	33	32-38	0	1	1	1	0	0	<3	9	36-40	yes	na	na	0	1	na	0	0	0	0	0	0	1	1	1	1	1	0-2	7	4-7
1	29	25-31	1	3	0	1	1	1-2	<3	na	na	del	2	5-8	1	0	4	0	0	0	1	1	1	0	0	0	0	0	3-4	9	>=8
5	25	25-31	2	1	1	1	1	1-2	<3	na	na	del	3	9-12	1	0	3	0	0	0	0	0	0	0	1	1	1	1	3-4	6	4-7
9	22	18-24	2	1	1	0	1	1-2	<3	na	na	del	3	9-12	1	0	3	0	0	0	0	0	0	0	0	0	1	1	3-4	6	4-7
15	28	25-31	1	1	1	1	1	1-2	<3	na	na	del	3	9-12	1	0	1	0	0	0	0	0	0	1	1	1	1	1	0-2	5	4-7
16	20	18-24	2	1	1	1	1	1-2	<3	na	na	del	5	17-20	1	0	1	1	0	1	1	1	1	1	1	1	1	1	0-2	6	4-7
18	36	32-38	1	3	2	1	1	1-2	<3	9	36-40	yes	na	na	1	0	1	0	0	0	0	0	0	0	0	0	0	0	0-2	5	4-7
21	35	32-38	1	3	0	0	1	1-2	<3	9	36-40	yes	na	na	1	0	1	0	0	0	0	0	0	0	0	0	0	0	0-2	4	4-7
26	29	25-31	1	3	1	1	1	1-2	<3	8	32-40	yes	na	na	1	0	2	0	0	0	0	0	1	0	0	0	0	0	0-2	4	4-7
32	28	25-31	1	1	2	0	1	1-2	<3	8	32-40	yes	na	na	1	0	3	0	0	0	1	0	1	1	1	1	1	1	3-4	6	4-7
35	24	18-24	2	1	1	1	1	1-2	<3	na	na	del	2	5-8	1	0	2	0	0	0	0	1	1	1	1	1	1	1	0-2	1	<4
39	32	32-38	1	3	0	1	1	1-2	<3	8	32-40	yes	na	na	1	0	2	0	0	0	0	0	0	0	0	0	0	0	0-2	7	4-7
43	34	32-38	1	2	1	0	1	1-2	<3	9	36-40	yes	na	na	1	0	2	0	0	1	1	1	1	0	0	0	1	1	0-2	6	4-7
49	28	25-31	1	1	1	0	1	1-2	<3	8	32-40	yes	na	na	1	0	1	0	0	0	0	0	0	0	0	0	0	0	0-2	2	<4
54	26	25-31	1	1	1	0	1	1-2	<3	8	32-40	yes	na	na	1	0	1	0	0	0	0	0	0	0	0	0	0	0	0-2	2	<4
63	29	25-31	2	1	1	1	1	1-2	<3	8	32-40	yes	na	na	2	1	na	1	1	1	1	1	1	1	1	1	1	1	0-2	4	4-7
64	28	25-31	1	1	1	1	1	1-2	<3	8	32-40	yes	na	na	1	1	na	1	0	1	1	1	1	1	0	1	1	1	0-2	2	<4
66	21	18-24	2	1	1	1	1	1-2	<3	8	32-40	yes	na	na	1	1	na	1	1	1	1	1	1	0	1	1	0	1	0-2	4	4-7
68	25	25-31	1	3	2	1	1	1-2	<3	na	na	del	3	9-12	1	0	1	0	0	0	0	0	0	0	0	0	0	0	0-2	5	4-7
77	40	39-45	1	0	1	1	1	1-2	<3	na	na	del	3	9-12	1	0	3	0	0	0	1	0	0	1	1	1	1		3-4	9	>=8
80	22	18-24	1	0	2	0	1	1-2	<3	na	na	del	3	9-12	1	0	4	1	0	0	1	0	1	0	0	0	1	1	3-4	6	4-7
81	25	25-31	1	1	1	1	1	1-2	<3	8	32-40	yes	na	na	1	0	2	0	0	0	1	1	1	1	1	1	1	0	0-2	4	4-7
83	23	18-24	0	2	2	1	1	1-2	<3	na	na	del	1	1-4	1	0	2	0	0	1	1	1	1	1	1	1	1	1	0-2	6	4-7
84	29	25-31	2	0	1	0	1	1-2	<3	na	na	del	3	9-12	1	0	2	0	0	0	0	0	0	0	0	0	1	1	0-2	3	<4
85	27	25-31	2	2	2	1	1	1-2	<3	na	na	del	6	21-24	1	0	4	0	0	0	1	0	1	0	1	1	1	1	3-4	5	4-7
90	44	39-45	1	1	1	0	1	1-2	<3	na	na	del	4	13-16	0	0	3	0	0	0	1	0	1	0	0	1	1	1	3-4	3	<4
99	22	18-24	1	1	2	0	1	1-2	<3	na	na	del	2	5-8	1	0	3	0	0	0	1	0	1	0	0	0	1	1	3-4	3	<4
103	31	25-31	1	1	1	1	1	1-2	<3	na	na	del	2	5-8	1	0	1	0	0	0	1	0	1	0	0	0	0	1	0-2	2	<4
105	19	18-24	1	0	2	0	1	1-2	<3	na	na	del	4	13-16	1	0	4	1	0	1	1	1	1	1	1	1	1	1	3-4	3	<4
108	24	18-24	2	1	1	1	1	1-2	<3	na	na	del	1	1-4	1	0	4	1	0	1	1	1	1	1	1	1	1	1	3-4	7	4-7
111	24	18-24	2	2	2	1	1	1-2	<3	na	na	del	3	9-12	1	0	1	0	0	0	0	0	0	0	0	3	0	3	0-2	6	4-7
112	27	25-31	2	2	2	2	1	1-2	<3	na	na	del	4	13-16	1	0	1	0	0	0	0	0	0	0	0	0	0	0	0-2	4	4-7
115	35	32-38	1	3	0	1	1	1-2	<3	na	na	del	3	9-12	1	0	3	0	0	0	0	0	0	0	0	0	0	0	3-4	4	4-7
116	31	25-31	1	3	1	1	1	1-2	<3	na	na	del	2	5-8	1	0	3	0	0	0	0	0	0	0	0	0	0	0	3-4	1	<4
117	23	18-24	1	1	1	1	1	1-2	<3	na	na	del	3.5	13-16	1	0	3	0	0	0	1	0	1	1	1	0	1	1	3-4	5	4-7
119	29	25-31	0	2	1	0	1	1-2	<3	na	na	del	5	17-20	1	0	3	0	0	0	0	0	0	0	0	0	0	0	3-4	7	4-7
120	39	39-45	2	0	1	0	1	1-2	<3	na	na	del	6	21-24	1	0	2	0	0	0	1	1	0	0	1	1	1	1	0-2	6	4-7
121	19	18-24	2	1	2	2	1	1-2	<3	na	na	del	3	9-12	1	0	3	0	0	0	0	0	0	0	1	0	0	0	3-4	7	4-7
126	33	32-38	2	2	0	1	1	1-2	<3	8	32-40	yes	na	na	1	0	3	0	0	0	0	0	0	0	0	0	0	0	3-4	1	<4
127	31	25-31	1	1	1	1	1	1-2	<3	9	36-40	yes	na	na	1	0	3	1	0	0	1	0	1	0	0	0	1	1	3-4	7	4-7
129	31	25-31	1	2	1	1	1	1-2	<3	8	32-40	yes	na	na	1	0	1	0	0	0	1	1	0	0	0	0	1	1	0-2	4	4-7
135	34	32-38	1	2	1	1	1	1-2	<3	8	32-40	yes	na	na	1	0	4	0	0	0	1	0	1	0	1	0	1	1	3-4	1	<4
144	22	18-24	2	1	1	1	1	1-2	<3	8	32-40	yes	na	na	1	0	4	1	0	0	0	0	0	0	0	0	1		3-4	4	4-7
145	24	18-24	1	1	1	1	1	1-2	<3	8	32-40	yes	na	na	1	0	2	0	0	0	0	0	0	0	0	0	1	1	0-2	4	4-7
147	28	25-31	1	2	1	0	1	1-2	<3	na	na	del	4	13-16	1	0	3	0	0	0	0	0	0	0	0	0	0	0	3-4	6	4-7
149	25	25-31	1	2	1	1	1	1-2	<3	na	na	del	1	1-4	1	0	3	0	0	1	1	1	1	0	0	0	0	0	3-4	6	4-7
150	27	25-31	1	1	2	1	1	1-2	<3	8	32-40	yes	na	na	1	0	1	0	0	1	1	1	1	0	1	1	1	1	0-2	8	>=8
151	34	32-38	2	1	1	1	1	1-2	<3	na	na	del	3	9-12	1	0	2	0	0	0	0	0	0	0	0	0	0	0	0-2	6	4-7
153	21	18-24	1	1	2	1	1	1-2	<3	na	na	del	5	17-20	1	0	3	0	0	0	0	0	0	0	0	0	0	0	3-4	7	4-7
160	33	32-38	1	1	1	1	1	1-2	<3	9	36-40	yes	na	na	1	0	3	0	0	0	0	0	0	0	0	0	0	0	3-4	8	>=8
161	31	25-31	1	1	1	0	1	1-2	<3	8	32-40	yes	na	na	1	0	2	0	0	0	0	0	0	0	0	0	1	1	0-2	8	>=8
166	31	25-31	1	1	1	0	1	1-2	<3	na	na	del	6	21-24	1	0	1	0	0	0	1	0	1	0	0	0	1	1	0-2	7	4-7
172	25	25-31	1	2	2	1	1	1-2	<3	na	na	del	3	9-12	1	0	2	0	0	0	1	0	0	0	1	1	1	1	0-2	10	>=8
176	21	18-24	1	1	2	0	1	1-2	<3	na	na	del	3	9-12	1	0	1	1	0	0	0	0	0	0	0	0	0	0	0-2	10	>=8
179	24	18-24	1	0	2	1	1	1-2	<3	9	36-40	yes	na	na	1	0	3	0	0	0	0	0	0	0	0	0	0	0	3-4	7	4-7
181	31	25-31	1	2	0	1	1	1-2	<3	9	36-40	yes	na	na	1	0	1	0	0	0	0	0	0	0	0	0	1	1	0-2	5	4-7
188	22	18-24	2	1	1	0	1	1-2	<3	8	32-40	yes	na	na	1	0	1	0	0	0	0	0	0	0	0	0	1	1	0-2	10	>=8
193	24	18-24	1	2	2	1	1	1-2	<3	9	36-40	yes	na	na	1	0	1	0	0	0	1	0	0	0	0	0	0	0	0-2	10	>=8
195	26	25-31	1	1	1	1	1	1-2	<3	8	32-40	yes	na	na	1	0	2	0	0	1	1	1	1	0	1	0	1	1	0-2	10	>=8
196	30	25-31	1	1	1	1	1	1-2	<3	8	32-40	yes	na	na	1	0	4	0	0	0	0	0	0	1	1	1	1	1	3-4	3	<4
198	25	25-31	2	1	1	0	1	1-2	<3	8	32-40	yes	na	na	1	0	1	0	0	0	0	0	0	0	1	0	0	0	0-2	6	4-7
201	23	18-24	2	0	1	1	1	1-2	<3	8	32-40	yes	na	na	1	0	2	1	0	1	1	1	1	0	1	1	1	1	0-2	5	4-7
202	22	18-24	0	1	1	1	1	1-2	<3	8	32-40	yes	na	na	1	0	3	1	0	1	1	1	1	0	0	0	0	0	3-4	2	<4
205	36	32-38	1	1	1	0	1	1-2	<3	9	36-40	yes	na	na	1	0	2	0	0	1	1	1	1	0	0	0	0	0	0-2	7	4-7
206	21	18-24	1	1	1	1	1	1-2	<3	8	32-40	yes	na	na	1	0	3	1	0	0	1	1	0	0	0	0	0	0	3-4	8	>=8
209	25	25-31	0	1	1	2	1	1-2	<3	8	32-40	yes	na	na	1	0	3	0	0	0	1	0	1	0	1	0	1	1	3-4	1	<4
210	21	18-24	1	1	1	0	1	1-2	<3	8	32-40	yes	na	na	1	0	4	1	0	0	0	0	0	1	1	1	1	1	0-2	7	4-7
211	27	25-31	1	1	1	0	1	1-2	<3	9	36-40	yes	na	na	1	0	2	0	0	0	0	0	0	0	0	0	0	0	3-4	5	4-7
214	40	39-45	1	1	1	0	1	1-2	<3	na	na	del	6	21-24	1	0	4	0	0	0	0	0	0	0	0	0	1	1	0-2	7	4-7
216	34	32-38	1	1	1	1	1	1-2	<3	na	na	del	2.5	9-12	4	0	3	0	0	0	1	1	1	0	0	0	1	1	3-4	6	4-7
220	24	18-24	2	1	2	1	1	1-2	<3	na	na	del	6	21-24	1	0	2	0	0	0	1	0	1	1	1	1	1	1	3-4	3	<4
225	32	32-38	1	3	0	0	1	1-2	<3	na	na	del	10	21-24	1	0	2	0	0	0	0	0	0	0	0	0	0	0	3-4	7	4-7
228	23	18-24	0	1	2	1	1	1-2	<3	na	na	del	3	9-12	1	0	2	0	0	0	1	0	1	0	0	0	1	1	0-2	5	4-7
229	21	18-24	2	0	2	1	1	1-2	<3	na	na	del	2	5-8	1	0	2	0	0	0	0	0	0	0	0	0	0	0	3-4	5	4-7
231	29	25-31	1	3	0	0	1	1-2	<3	9	36-40	yes	na	na	1	0	2	0	0	0	0	0	0	0	0	0	0	0	3-4	7	4-7
235	24	18-24	2	1	1	1	1	1-2	<3	8	32-40	yes	na	na	1	1	na	1	0	0	1	1	1	1	1	1	1	1	0-2	5	4-7
236	24	18-24	1	2	2	1	1	1-2	<3	8	32-40	yes	na	na	0	0	2	0	0	1	1	1	1	1	1	1	1	1	0-2	6	4-7
239	23	18-24	2	2	1	1	1	1-2	<3	na	na	del	2	5-8	1	0	3	0	0	0	1	0	1	0	0	0	1	1	0-2	4	4-7
241	25	25-31	0	1	1	1	1	1-2	<3	na	na	del	3	9-12	1	0	2	1	0	0	1	0	1	0	0	0	1	1	3-4	10	>=8
245	28	25-31	1	3	0	1	1	1-2	<3	na	na	del	3	9-12	1	0	1	0	0	0	0	0	1	0	0	0	0	0	3-4	4	4-7
249	23	18-24	1	1	2	1	1	1-2	<3	8	32-40	yes	na	na	0	0	3	0	0	0	1	0	1	0	0	0	0		0-2	6	4-7
254	25	25-31	1	1	1	1	1	1-2	<3	8	32-40	yes	na	na	1	0	1	0	0	0	0	0	0	0	0	0	0	0	0-2	8	>=8
257	39	39-45	1	1	1	0	1	1-2	<3	9	36-40	yes	na	na	0	0	4	1	0	0	0	0	0	0	0	0	0	0	3-4	1	<4
261	29	25-31	1	1	1	1	1	1-2	<3	9	36-40	yes	na	na	2	1	na	1	0	1	1	1	1	1	1	1	1	1	0-2	5	4-7
262	22	18-24	0	0	1	1	1	1-2	<3	8	32-40	yes	na	na	1	1	na	1	0	1	1	1	1	1	1	1	1	1	0-2	2	<4
265	30	25-31	1	3	0	0	1	1-2	<3	na	na	del	1	1-4	1	0	1	0	0	0	0	0	0	1	1	1	1	1	0-2	3	<4
266	29	25-31	1	1	1	1	1	1-2	<3	9	36-40	yes	na	na	1	0	1	0	0	0	0	0	0	0	0	0	1	1	0-2	4	4-7
269	37	32-38	2	2	1	0	1	1-2	<3	8	32-40	yes	na	na	1	0	2	0	0	0	0	0	0	0	0	0	0	0	0-2	5	4-7
272	24	18-24	2	2	1	1	1	1-2	<3	na	na	del	1	1-4	1	0	2	0	0	0	0	0	1	0	0	0	0	0	0-2	3	<4
273	18	18-24	0	2	2	0	1	1-2	<3	na	na	del	6	21-24	1	0	2	0	0	0	1	1	1	1	1	1	1	1	0-2	2	<4
275	21	18-24	1	1	2	1	1	1-2	<3	na	na	del	4	13-16	1	0	2	0	0	0	1	0	1	0	0	1	1	1	0-2	6	4-7
279	18	18-24	0	2	1	1	1	1-2	<3	na	na	del	2	5-8	1	0	3	0	0	0	1	0	1	0	0	0	0	0	3-4	2	<4
282	34	32-38	1	2	1	0	1	1-2	<3	na	na	del	1	1-4	1	0	4	1	0	0	0	0	0	0	0	0	1	1	3-4	7	4-7
283	34	32-38	1	1	1	1	1	1-2	<3	na	na	del	1	1-4	1	1	na	1	0	0	1	1	1	0	0	0	1	1	0-2	5	4-7
288	30	25-31	1	1	1	1	1	1-2	<3	8	32-40	yes	na	na	1	0	3	0	0	0	0	0	0	0	0	0	0	0	0-2	6	4-7
292	22	18-24	2	1	2	1	1	1-2	<3	na	na	del	3	9-12	1	0	4	0	0	0	0	0	0	0	0	1	1	1	3-4	5	4-7
293	27	25-31	0	2	1	1	1	1-2	<3	9	36-40	yes	na	na	1	0	1	0	0	0	1	0	0	0	1	1	11		0-2	5	4-7
294	26	25-31	1	3	0	1	1	1-2	<3	na	na	del	1	1-4	1	0	4	0	0	0	0	0	0	0	0	0	0	0	0-2	2	<4
296	34	32-38	1	2	1	1	1	1-2	<3	8	32-40	yes	na	na	1	0	1	0	0	1	1	1	1	0	0	0	1	1	3-4	4	4-7
297	34	32-38	1	2	1	1	1	1-2	<3	8	32-40	yes	na	na	1	0	2	1	0	0	0	0	0	0	0	0	1	1	0-2	10	>=8
298	25	25-31	1	0	1	1	1	1-2	<3	8	32-40	yes	na	na	1	0	4	0	0	0	1	1	1	1	1	1	1	1	3-4	5	4-7
303	23	18-24	2	0	2	1	1	1-2	<3	9	36-40	yes	na	na	1	1	na	1	0	0	1	1	1	1	1	1	1	1	0-2	2	<4
304	29	25-31	1	1	1	1	1	1-2	<3	9	36-40	yes	na	na	1	0	3	0	0	0	1	1	0	0	0	0	0	0	3-4	4	4-7
305	30	25-31	1	1	1	1	1	1-2	<3	9	36-40	yes	na	na	1	0	2	0	0	0	0	0	0	0	0	0	0	0	0-2	8	>=8
309	30	25-31	1	2	1	0	1	1-2	<3	9	36-40	yes	na	na	1	0	3	0	0	0	1	0	1	0	0	0	1		0-2	3	<4
312	27	25-31	1	1	1	1	1	1-2	<3	8	32-40	yes	na	na	1	0	1	0	0	0	1	0	1	0	0	0	1	1	0-2	2	<4
313	33	32-38	1	0	1	1	1	1-2	<3	8	32-40	yes	na	na	1	0	3	0	0	0	1	0	1	0	0	0	1	1	3-4	5	4-7
315	26	25-31	1	2	2	1	1	1-2	<3	8	32-40	yes	na	na	1	0	3	0	0	0	0	0	0	0	0	0	0	0	0-2	1	<4
318	21	18-24	1	1	1	0	1	1-2	<3	8	32-40	yes	na	na	1	0	2	0	0	0	1	0	1	0	0	0	1	1	3-4	8	>=8
324	20	18-24	2	2	1	0	1	1-2	<3	na	na	del	2	5-8	1	0	3	0	0	0	0	0	0	0	0	0	0	0	3-4	4	4-7
325	33	32-38	1	0	1	0	1	1-2	<3	9	36-40	yes	na	na	1	0	3	0	0	0	0	1	1	0	0	0	0	0	3-4	8	>=8
327	21	18-24	1	1	1	0	1	1-2	<3	9	36-40	yes	na	na	1	0	4	1	0	1	1	0	1	0	1	0	1	1	0-2	3	<4
333	30	25-31	1	3	1	1	1	1-2	<3	na	na	del	2	5-8	1	0	2	0	0	0	0	0	0	0	1	0	0	0	0-2	6	4-7
337	30	25-31	2	2	1	1	1	1-2	<3	na	na	del	3	9-12	1	0	3	1	0	1	1	1	1	0	0	0	1	1	3-4	2	<4
340	18	18-24	2	1	1	0	1	1-2	<3	na	na	del	2	5-8	1	0	1	0	0	0	0	0	0	1	1	1	1	1	3-4	7	4-7
342	24	18-24	2	1	2	0	1	1-2	<3	na	na	del	2	5-8	1	1	na	1	0	0	1	1	1	0	0	0	1	1	3-4	5	4-7
346	26	25-31	1	2	1	1	1	1-2	<3	na	na	del	2	5-8	1	0	2	0	1	0	1	1	1	1	1	1	1	1	0-2	8	>=8
350	26	25-31	1	1	1	1	1	1-2	<3	8	32-40	yes	na	na	1	0	3	0	0	0	0	0	0	0	0	0	0	0	0-2	9	>=8
354	32	32-38	1	1	1	0	1	1-2	<3	8	32-40	yes	na	na	1	0	1	1	0	0	1	1	1	1	1	0	1	1	0-2	2	<4
356	33	32-38	1	2	0	0	1	1-2	<3	na	na	del	3	9-12	1	0	2	0	0	0	0	0	0	0	0	0	0	0	0-2	7	4-7
357	27	25-31	1	2	1	1	1	1-2	<3	na	na	del	2	5-8	1	0	2	0	0	0	1	0	1	1	1	0	1	1	3-4	5	4-7
358	27	25-31	1	1	1	0	1	1-2	<3	na	na	del	4	13-16	1	0	1	1	0	1	1	1	1	0	1	0	1	1	3-4	6	4-7
359	29	25-31	1	0	1	1	1	1-2	<3	na	na	del	2	5-8	1	0	3	0	0	0	1	0	1	0	0	0	1	1	0-2	7	4-7
362	22	18-24	1	2	2	1	1	1-2	<3	na	na	del	3	9-12	1	1	na	0	0	0	1	0	0	0	0	0	0	0	0-2	6	4-7
363	25	25-31	1	0	2	1	1	1-2	<3	na	na	del	1	1-4	1	1	na	0	1	1	1	1	1	1	1	1	1	1	3-4	6	4-7
365	34	32-38	1	1	1	1	1	1-2	<3	na	na	del	1	1-4	1	0	3	0	0	0	1	0	1	0	1	0	1	1	3-4	3	<4
367	28	25-31	1	3	1	0	1	1-2	<3	na	na	del	1	1-4	1	0	3	0	0	0	0	0	0	0	0	0	0	0	0-2	7	4-7
368	31	25-31	1	1	1	1	1	1-2	<3	na	na	del	1	1-4	1	1	na	0	0	0	0	0	0	1	1	1	1	1	0-2	8	>=8
369	33	32-38	2	1	1	1	1	1-2	<3	na	na	del	1	1-4	0	0	2	0	0	0	0	0	0	0	0	0	1	1	3-4	9	>=8
371	24	18-24	1	2	0	1	1	1-2	<3	na	na	del	1	1-4	1	0	3	0	0	0	0	0	0	0	0	0	1	1	3-4	10	>=8
374	29	25-31	1	2	1	1	1	1-2	<3	8	32-40	yes	na	na	1	0	1	0	0	0	0	0	0	0	0	0	0	1	3-4	4	4-7
375	21	18-24	0	1	2	1	1	1-2	<3	9	36-40	yes	na	na	1	0	4	1	0	1	0	1	1	0	1	0	1	0	3-4	4	4-7
379	29	25-31	1	3	0	0	1	1-2	<3	na	na	del	1	1-4	1	0	1	0	0	1	0	0	0	1	1	1	1	1	0-2	7	4-7
380	28	25-31	1	2	1	1	1	1-2	<3	na	na	del	3	9-12	1	0	2	0	0	0	0	0	0	0	0	1	0	1	0-2	6	4-7
381	23	18-24	1	1	1	1	1	1-2	<3	na	na	del	2	5-8	1	0	2	1	0	1	1	1	1	1	0	0	0	1	3-4	7	4-7
384	24	18-24	0	1	2	1	1	1-2	<3	na	na	del	2	5-8	1	0	2	1	0	1	1	1	1	1	1	0	1	1	0-2	6	4-7
3	24	18-24	1	1	1	0	2	1-2	<3	na	na	del	3	9-12	2	0	1	0	0	0	0	0	0	0	0	0	0	0	0-2	7	4-7
6	26	25-31	1	2	1	1	2	1-2	<3	na	na	del	4	13-16	2	0	3	0	0	0	0	0	0	0	0	0	0	0	3-4	9	>=8
8	28	25-31	1	2	1	1	2	1-2	<3	na	na	del	1	1-4	2	0	3	1	0	0	1	0	1	0	1	1	1	1	3-4	6	4-7
10	22	18-24	2	0	1	1	2	1-2	<3	na	na	del	6	21-24	2	0	2	1	0	0	1	0	1	1	1	1	1	1	0-2	5	4-7
12	27	25-31	2	1	2	1	2	1-2	<3	na	na	del	1	1-4	0	0	3	0	0	0	0	0	0	0	0	0	1	1	3-4	4	4-7
13	25	25-31	1	1	1	1	2	1-2	<3	na	na	del	4	13-16	1	1	na	1	0	0	1	0	1	0	0	0	1	1	3-4	9	>=8
14	25	25-31	1	1	1	1	2	1-2	<3	na	na	del	4	13-16	1	0	3	1	0	0	1	0	1	0	1	1	1	1	3-4	6	4-7
19	21	18-24	1	1	1	1	2	1-2	<3	8	32-40	yes	na	na	2	0	4	0	0	0	0	0	0	0	0	0	0	0	3-4	6	4-7
24	29	25-31	1	2	0	0	2	1-2	<3	na	na	del	2	5-8	2	1	na	1	0	0	1	0	1	0	0	0	0	1	3-4	4	4-7
25	28	25-31	1	1	0	1	2	1-2	<3	9	36-40	yes	na	na	2	0	4	0	0	0	0	0	0	0	0	0	0	0	3-4	5	4-7
30	29	25-31	1	3	0	0	2	1-2	<3	na	na	del	4	13-16	2	0	3	0	0	0	0	0	1	0	0	0	1	1	3-4	6	4-7
33	24	18-24	1	0	1	1	2	1-2	<3	8	32-40	yes	na	na	2	0	4	1	0	1	1	1	1	0	1	1	1	1	3-4	3	<4
36	30	25-31	1	1	1	1	2	1-2	<3	na	na	del	6	21-24	2	0	3	0	0	0	0	0	0	0	0	0	1	1	3-4	3	<4
37	32	32-38	1	0	1	1	2	1-2	<3	na	na	del	3	9-12	2	0	4	0	0	0	1	0	1	0	0	0	0	0	3-4	3	<4
42	32	32-38	1	1	1	1	2	1-2	<3	9	36-40	yes	na	na	2	0	4	0	0	0	1	0	1	0	1	0	1	1	3-4	3	<4
45	28	25-31	1	2	1	1	2	1-2	<3	9	36-40	yes	na	na	2	0	3	0	0	0	0	0	1	0	0	0	0	0	3-4	5	4-7
47	27	25-31	1	2	1	1	2	1-2	<3	8	32-40	yes	na	na	0	0	1	0	0	0	0	0	0	0	0	0	0	0	0-2	2	<4
48	37	32-38	1	1	1	1	2	1-2	<3	8	32-40	yes	na	na	2	1	na	1	0	0	0	0	0	1	1	1	1	1	3-4	4	4-7
53	32	32-38	1	1	1	1	2	1-2	<3	8	32-40	yes	na	na	2	0	3	1	0	0	1	0	1	0	1	0	1	1	3-4	2	<4
55	30	25-31	1	2	1	1	2	1-2	<3	8	32-40	yes	na	na	2	0	1	0	0	o	0	0	0	1	0	0	1	1	0-2	6	4-7
58	26	25-31	1	1	1	0	2	1-2	<3	9	36-40	yes	na	na	2	0	2	0	0	0	1	0	1	0	0	0	1	1	0-2	2	<4
59	38	32-38	1	2	1	1	2	1-2	<3	9	36-40	yes	na	na	2	0	2	0	0	0	0	0	0	0	0	0	1	1	0-2	4	4-7
61	29	25-31	1	0	1	2	2	1-2	<3	8	32-40	yes	na	na	2	0	4	0	0	0	0	0	0	1	1	1	1	1	3-4	10	>=8
62	32	32-38	1	1	2	0	2	1-2	<3	na	na	del	4	13-16	2	0	1	1	0	0	1	0	1	1	1	1	1	1	0-2	8	>=8
67	30	25-31	1	0	2	1	2	1-2	<3	8	32-40	yes	na	na	2	0	1	0	0	0	1	0	0	1	0	1	1	1	0-2	1	<4
71	26	25-31	1	2	1	1	2	1-2	<3	8	32-40	yes	na	na	2	0	2	0	0	0	0	0	0	0	0	0	0	0	0-2	7	4-7
76	29	25-31	1		1	1	2	1-2	<3	na	na	del	5	17-20	2	0	3	0	0	0	0	0	1	0	0	1	1	1	3-4	5	4-7
78	34	32-38	1	1	1	1	2	1-2	<3	8	32-40	yes	na	na	2	0	3	0	0	1	1	1	1	1	1	1	1	1	3-4	3	<4
79	25	25-31	1	1	2	1	2	1-2	<3	8	32-40	yes	na	na	2	0	4	0	0	0	1	1	1	0	0	0	1	1	0-2	3	<4
82	27	25-31	1	1	0	1	2	1-2	<3	8	32-40	yes	na	na	1	0	2	1	1	0	1	0	1	1	1	0	0	0	0-2	2	<4
88	32	32-38	1	1	1	1	2	1-2	<3	na	na	del	1	1-4	2	0	2	0	0	0	0	0	0	0	0	1	1	1	0-2	5	4-7
91	27	25-31	2	2	0	0	2	1-2	<3	na	na	del	4	13-16	2	0	1	0	0	0	0	0	1	0	0	0	1	1	0-2	5	4-7
92	27	25-31	2	0	2	2	2	1-2	<3	na	na	del	2	5-8	2	0	3	1	0	1	1	1	1	1	1	1	1	1	3-4	4	4-7
93	33	32-38	1	1	1	0	2	1-2	<3	na	na	del	6	21-24	2	0	3	1	0	0	1	0	1	0	0	0	1	1	3-4	1	<4
94	28	25-31	1	2	1	1	2	1-2	<3	na	na	del	2	5-8	2	0	3	0	0	0	1	1	1	0	1	0	1	1	3-4	2	<4
95	32	32-38	1	1	1	1	2	1-2	<3	9	36-40	yes	na	na	2	0	3	0	0	0	1	1	1	1	1	1	1	1	3-4	7	4-7
96	30	25-31	1	0	1	1	2	1-2	<3	na	na	del	5	17-20	2	0	3	0	1	0	0	0	1	0	0	0	0	0	3-4	3	<4
100	28	25-31	1	1	0	0	2	1-2	<3	na	na	del	3	9-12	2	0	2	0	0	0	0	0	1	0	0	1	1	1	0-2	9	>=8
101	36	32-38	1	0	1	1	2	1-2	<3	na	na	del	3	9-12	2	0	3	1	0	0	1	1	1	0	1	0	1	1	3-4	6	4-7
102	31	25-31	1	1	1	1	2	1-2	<3	8	32-40	yes	na	na	2	0	2	0	0	0	1	0	1	0	0	0	0	0	0-2	5	4-7
104	33	32-38	1	2	1	1	2	1-2	<3	na	na	del	2	5-8	2	0	4	0	0	0	1	0	1	1	1	1	1	1	3-4	7	4-7
110	31	25-31	0	2	1	0	2	1-2	<3	na	na	del	5	17-20	0	0	3	0	0	0	1	0	1	0	0	0	1	1	3-4	6	4-7
114	30	25-31	1	2	0	0	2	1-2	<3	na	na	del	4	13-16	2	0	3	0	0	0	0	0	0	0	0	0	0	0	3-4	6	4-7
118	27	25-31	1	1	1	0	2	1-2	<3	na	na	del	4	13-16	2	0	3	1	0	0	1	0	1	0	1	1	1	1	3-4	6	4-7
124	24	18-24	0	1	2	1	2	1-2	<3	na	na	del	6	21-24	2	1	na	1	0	1	1	1	1	0	1	1	1	1	3-4	8	>=8
130	31	25-31	1	2	1	0	2	1-2	<3	9	36-40	yes	na	na	2	0	2	0	0	0	0	0	0	0	0	0	1	1	0-2	4	4-7
134	29	25-31	1	2	0	0	2	1-2	<3	10	36-40	yes	na	na	2	0	3	0	0	0	1	0	1	0	1	0	1	1	3-4	7	4-7
136	34	32-38	1	1	1	0	2	1-2	<3	8	32-40	yes	na	na	2	1	na	0	0	0	1	0	1	0	0	0	1	1	3-4	6	4-7
137	29	25-31	1	1	2	1	2	1-2	<3	8	32-40	yes	na	na	2	0	3	1	0	0	1	0	1	0	0	0	0	0	3-4	6	4-7
138	33	32-38	1	1	1	1	2	1-2	<3	9	36-40	yes	na	na	2	0	1	1	0	0	1	0	1	0	0	0	0	0	0-2	5	4-7
140	33	32-38	1	1	1	0	2	1-2	<3	9	36-40	yes	na	na	0	0	3	0	0	0	1	0	1	0	0	0	1	1	3-4	6	4-7
148	35	32-38	1	1	1	1	2	1-2	<3	na	na	del	1	1-4	2	0	1	0	0	0	0	0	0	0	0	0	0	0	0-2	4	4-7
152	22	18-24	2	0	1	1	2	1-2	<3	na	na	del	3	9-12	2	0	2	0	0	0	0	0	0	0	0	0	0	0	0-2	1	<4
155	34	32-38	1	1	1	0	2	1-2	<3	na	na	del	5	17-20	2	0	2	0	0	0	0	0	0	0	0	0	0	0	0-2	6	4-7
156	21	18-24	1	1	2	0	2	1-2	<3	na	na	del	5	17-20	2	0	2	0	0	0	1	0	1	0	0	0	1	1	0-2	5	4-7
157	23	18-24	1	1	1	0	2	1-2	<3	9	36-40	yes	na	na	2	0	2	0	0	0	0	0	0	0	0	0	0	0	0-2	1	<4
158	45	39-45	1	0	1	0	2	1-2	<3	8	32-40	yes	na	na	2	0	3	0	0	0	0	0	0	1	1	1	1	1	3-4	5	4-7
162	32	32-38	1	2	1	1	2	1-2	<3	na	na	del	5	17-20	2	0	2	0	0	0	0	0	0	0	0	0	0	0	0-2	7	4-7
168	28	25-31	1	1	2	1	2	1-2	<3	9	36-40	yes	na	na	2	0	2	1	0	1	1	1	1	0	1	1	1	1	0-2	6	4-7
169	23	18-24	1	1	1	2	2	1-2	<3	9	36-40	yes	na	na	2	0	3	0	0	0	0	0	0	0	0	0	0	0	3-4	3	<4
170	28	25-31	1	1	1	1	2	1-2	<3	na	na	del	3	9-12	2	0	3	0	0	0	0	0	0	0	0	0	0	0	3-4	5	4-7
173	25	25-31	1	2	1	0	2	1-2	<3	na	na	del	6	21-24	2	0	3	0	0	0	0	0	0	0	0	0	0	0	3-4	1	<4
178	32	32-38	1	2	1	0	2	1-2	<3	8	32-40	yes	na	na	2	0	1	0	0	0	0		0	0	0	0	0	0	0-2	6	4-7
183	31	25-31	2	0	1	0	2	1-2	<3	8	32-40	yes	na	na	2	0	1	0	0	1	1	1	1	1	1	1	1	1	0-2	7	4-7
184	28	25-31	2	1	1	1	2	1-2	<3	9	36-40	yes	na	na	2	0	1	0	0	1	1	1	1	0	0	0	0	0	0-2	2	<4
189	30	25-31	1	1	1	1	2	1-2	<3	8	32-40	yes	na	na	2	0	1	0	0	0	0	0	0	0	1	0	1	1	0-2	5	4-7
190	37	32-38	1	0	1	0	2	1-2	<3	8	32-40	yes	na	na	2	0	2	0	0	0	0	0	0	1	1	0	1	1	0-2	6	4-7
191	37	32-38	1	1	1	1	2	1-2	<3	8	32-40	yes	na	na	2	0	3	0	0	0	0	0	0	0	0	0	1	1	3-4	6	4-7
192	34	32-38	1	2	1	0	2	1-2	<3	8	32-40	yes	na	na	2	0	4	0	0	0	1	1	1	0	1	0	1	1	3-4	9	>=8
194	28	25-31	1	1	1	1	2	1-2	<3	8	32-40	yes	na	na	2	0	4	0	0	1	1	1	1	1	1	1	1	1	3-4	6	4-7
199	28	25-31	2	1	1	1	2	1-2	<3	8	32-40	yes	na	na	2	1	na	0	0	1	1	1	1	0	0	0	0		5-6	6	4-7
204	32	32-38	1	0	1	0	2	1-2	<3	8	32-40	yes	na	na	2	0	1	1	0	1	1	1	1	0	0	0	0	0	0-2	4	4-7
212	29	25-31	0	1	1	1	2	1-2	<3	8	32-40	yes	na	na	2	0	3	0	0	0	0	0	0	0	0	0	0	0	0-2	3	<4
213	32	32-38	2	1	1	0	2	1-2	<3	9	36-40	yes	na	na	2	0	1	0	0	1	1	1	1	0	0	0	1	1	3-4	3	<4
215	40	39-45	1	1	1	1	2	1-2	<3	8	32-40	yes	na	na	2	0	2	0	0	0	1	0	1	1	1	1	1	1	3-4	3	<4
217	29	25-31	2	2	1	0	2	1-2	<3	na	na	del	4	13-16	2	0	3	0	0	0	1	0	1	1	1	1	1	1	0-2	3	<4
218	25	25-31	2	0	1	1	2	1-2	<3	na	na	del	6	21-24	2	0	2	1	0	0	1	0	1	1	1	1	1	1	0-2	4	4-7
230	21	18-24	1	1	1	0	2	1-2	<3	9	36-40	yes	na	na	0	0	3	1	0	1	1	1	1	1	0	0	0	0	0-2	6	4-7
234	29	25-31	1	1	1	1	2	1-2	<3	8	32-40	yes	na	na	2	0	1	1	1	0	1	1	1	0	0	0	0	0	3-4	4	4-7
237	24	18-24	0	2	1	2	2	1-2	<3	8	32-40	yes	na	na	2	0	2	1	0	0	1	0	1	0	0	0	0	0	0-2	3	<4
238	33	32-38	1	1	1	1	2	1-2	<3	9	36-40	yes	na	na	2	0	2	0	0	0	0	0	0	0	0	0	1	1	3-4	6	4-7
246	32	32-38	1	3	1	0	2	1-2	<3	9	36-40	yes	na	na	2	0	4	0	0	0	1	0	1	0	0	0	0	0	3-4	3	<4
247	32	32-38	1	2	1	1	2	1-2	<3	9	36-40	yes	na	na	0	0	3	0	0	0	0	0	0	0	1	0	1	1	3-4	3	<4
250	30	25-31	1	2	2	2	2	1-2	<3	8	32-40	yes	na	na	0	0	1	0	0	0	0	0	0	0	0	0	0	0	3-4	4	4-7
270	30	25-31	1	3	2	0	2	1-2	<3	8	32-40	yes	na	na	2	0	1	0	0	0	0	0	0	0	0	0	1	1	0-2	2	<4
277	29	25-31	1	3	0	0	2	1-2	<3	na	na	del	3	9-12	2	0	1	0	0	0	0	0	0	0	0	0	0	0	3-4	3	<4
281	25	25-31	1	3	0	0	2	1-2	<3	na	na	del	1	1-4	1	1	na	1	0	0	0	0	0	1	1	0	1	1	0-2	1	<4
284	29	25-31	1	2	1	1	2	1-2	<3	na	na	del	4	13-16	2	1	na	1	0	0	0	0	0	0	1	0	1	0	0-2	2	<4
285	30	25-31	1	0	1	1	2	1-2	<3	9	36-40	yes	na	na	2	1	na	0	0	0	1	0	1	1	1	0	0	1	3-4	6	4-7
306	28	25-31	2	1	1	1	2	1-2	<3	8	32-40	yes	na	na	0	0	3	0	0	0	1	0	1	0	0	0	1	1	3-4	4	4-7
307	28	25-31	1	1	1	1	2	1-2	<3	9	36-40	yes	na	na	2	0	1	1	0	1	1	1	1	1	1	1	1	1	3-4	2	<4
314	29	25-31	1	1	1	0	2	1-2	<3	9	36-40	yes	na	na	2	0	1	0	0	0	0	0	0	0	0	0	0	0	0-2	5	4-7
321	36	32-38	1	2	1	1	2	1-2	<3	9	36-40	yes	na	na	2	0	2	0	0	0	0	0	0	0	0	0	0	0	0-2	4	4-7
322	37	32-38	1	2	1	0	2	1-2	<3	9	36-40	yes	na	na	2	0	2	0	1	0	0	0	0	1	1	0	1	0	3-4	4	4-7
328	35	32-38	1	1	1	0	2	1-2	<3	8	32-40	yes	na	na	2	0	1	0	0	0	0	0	0	0	0	0	0	0	0-2	6	4-7
329	30	25-31	1	2	1	1	2	1-2	<3	na	na	del	1	1-4	2	0	1	0	0	0	1	1	1	0	0	1	1	1	0-2	4	4-7
332	29	25-31	1	1	2	1	2	1-2	<3	na	na	del	3	9-12	2	0	1	0	0	0	1	1	1	0	0	0	1	1	0-2	6	4-7
335	28	25-31	1	0	2	1	2	1-2	<3	na	na	del	2	5-8	2	0	2	0	0	0	1	0	0	0	0	0	1	1	3-4	2	<4
338	30	25-31	1	2	0	0	2	1-2	<3	na	na	del	2	5-8	2	0	1	0	0	0	0	0	0	0	0	0	0	0	0-2	4	4-7
339	27	25-31	1	1	1	0	2	1-2	<3	na	na	del	1	1-4	2	0	3	0	0	0	0	0	0	0	0	0	0	0	3-4	3	<4
344	37	32-38	1	0	1	1	2	1-2	<3	na	na	del	1	1-4	1	0	3	0	0	0	0	0	0	0	1	0	1	1	0-2	6	4-7
345	34	32-38	1	1	2	0	2	1-2	<3	na	na	del	1	1-4	2	0	2	0	0	0	1	0	1	0	0	0	0	0	0-2	4	4-7
347	26	25-31	1	0	1	1	2	1-2	<3	na	na	del	1	1-4	2	0	2	0	0	1	1	1	1	0	0	0	0	0	0-2	4	4-7
355	32	32-38	1	2	1	1	2	1-2	<3	9	36-40	yes	na	na	2	0	2	0	0	0	0	0	0	0	1	0	1	1	0-2	7	4-7
361	27	25-31	1	1	1	1	2	1-2	<3	9	36-40	yes	na	na	2	0	1	0	0	0	0	0	0	0	0	0	0	0	3-4	8	>=8
370	28	25-31	1	2	1	1	2	1-2	<3	na	na	del	2	5-8	2	0	1	0	0	0	0	0	0	0	0	0	1	0	0-2	4	4-7
372	37	32-38	1	2	1	1	2	1-2	<3	9	36-40	yes	na	na	2	0	2	0	0	0	0	0	0	0	0	0	1	1	0-2	7	4-7
385	30	25-31	2	1	1	1	2	1-2	<3	na	na	del	3	9-12	2	0	3	0	0	0	0	0	0	1	1	0	1	1	3-4	7	4-7
2	29	25-31	1	1	1	0	3	3-4	>=3	na	na	del	3	9-12	3	0	3	0	0	0	0	0	0	0	0	0	0	0	3-4	3	<4
4	33	32-38	1	0	1	0	3	3-4	>=3	na	na	del	1	1-4	3	0	3	1	0	0	0	0	0	0	0	0	0	0	3-4	6	4-7
7	28	25-31	1	2	1	1	3	3-4	>=3	na	na	del	2	5-8	0	0	1	1	0	0	0	0	0	0	0	1	1	1	0-2	8	>=8
20	40	39-45	1	1	1	0	3	3-4	>=3	8	32-40	yes	na	na	3	0	1	0	0	0	0	0	0	0	0	0	0	0	0-2	4	4-7
23	30	25-31	2	0	2	1	3	3-4	>=3	na	na	del	3	9-12	3	0	1	0	0	0	1	0	1	0	0	0	0	0	0-2	4	4-7
27	31	25-31	1	1	1	0	3	3-4	>=3	8	32-40	yes	na	na	3	0	1	0	0	0	0	0	1	0	0	0	1	1	0-2	5	4-7
28	27	25-31	1	2	2	1	3	3-4	>=3	na	na	del	6	21-24	3	0	2	0	0	0	0	0	1	0	0	0	1	1	0-2	7	4-7
31	44	39-45	2	1	2	1	3	3-4	>=3	9	36-40	yes	na	na	3	0	2	1	0	0	1	0	1	0	1	0	1	1	0-2	5	4-7
57	30	25-31	1	0	2	1	3	3-4	>=3	9	36-40	yes	na	na	3	0	1	0	0	0	0	0	1	0	0	0	1	1	0-2	6	4-7
60	26	25-31	1	1	1	1	3	3-4	>=3	9	36-40	yes	na	na	3	0	5	0	0	0	0	0	0	0	0	0	0	0	5-6	8	>=8
70	22	18-24	0	2	2	0	3	3-4	>=3	na	na	del	4	13-16	3	0	3	0	0	1	1	1	1	0	0	1	1	1	3-4	5	4-7
72	34	32-38	1	1	1	1	3	3-4	>=3	9	36-40	yes	na	na	3	0	1	1	0	0	1	0	1	0	0	0	1	1	0-2	5	4-7
86	32	32-38	1	2	1	0	3	3-4	>=3	na	na	del	3	9-12	2	0	3	0	0	0	1	0	1	1	1	1	1	1	3-4	6	4-7
87	39	39-45	1	1	1	1	3	3-4	>=3	na	na	del	4	13-16	3	0	3	1	0	0	1	0	1	0	1	0	1	1	3-4	6	4-7
89	29	25-31	1	1	1	1	3	3-4	>=3	na	na	del	6	21-24	3	0	2	0	0	0	0	0	1	0	0	0	0	0	0-2	4	4-7
109	32	32-38	1	1	1	1	3	3-4	>=3	na	na	del	1	1-4	3	0	4	0	0	0	0	0	0	0	0	0	1	1	3-4	7	4-7
122	20	18-24	2	1	1	0	3	3-4	>=3	na	na	del	1	1-4	3	1	na	1	0	1	1	1	1	1	1	1	1	1	3-4	6	4-7
139	33	32-38	1	1	1	0	3	3-4	>=3	10	36-40	yes	na	na	3	0	3	0	0	0	0	0	0	0	0	0	1		3-4	8	>=8
154	25	25-31	1	1	2	0	3	3-4	>=3	na	na	del	5	17-20	3	0	1	0	0	0	0	0	0	0	0	0	0	0	0-2	10	>=8
164	32	32-38	1	1	1	1	3	3-4	>=3	na	na	del	5	17-20	3	0	3	0	0	0	0	0	1	0	0	0	0	0	3-4	8	>=8
167	32	32-38	2	0	1	1	3	3-4	>=3	na	na	del	3	9-12	3	0	3	0	0	0	0	0	0	0	0	0	0	0	3-4	4	4-7
171	27	25-31	1	1	1	1	3	3-4	>=3	9	36-40	yes	na	na	3	0	1	1	0	0	0	0	0	0	1	1	1	1	0-2	3	<4
174	28	25-31	1	1	1	1	3	3-4	>=3	na	na	del	6	21-24	3	0	3	0	0	1	0	0	1	1	1	1	1	1	3-4	2	<4
175	29	25-31	1	1	1	0	3	3-4	>=3	na	na	del	3	9-12	3	0	3	0	0	0	0	0	0	0	0	0	1	1	3-4	8	>=8
177	33	32-38	1	2	1	1	3	3-4	>=3	8	32-40	yes	na	na	3	0	2	0	0	0	1	0	1	1	1	1	1	1	0-2	3	<4
180	30	25-31	1	0	1	1	3	3-4	>=3	9	36-40	yes	na	na	3	0	2	0	0	0	0	0	0	0	0	0	0	0	0-2	7	4-7
207	24	18-24	2	1	1	1	3	3-4	>=3	8	32-40	yes	na	na	3	0	2	0	0	0	0	0	0	0	0	0	0	0	0-2	3	<4
219	30	25-31	1	2	1	1	3	3-4	>=3	na	na	del	2	5-8	3	0	2	0	0	0	0	0	0	0	0	0	1	1	3-4	3	<4
222	37	32-38	1	1	1	0	3	3-4	>=3	na	na	del	3	9-12	3	0	2	0	0	1	0	0	0	0	1	0	1	1	3-4	7	4-7
226	33	32-38	1	1	1	0	3	3-4	>=3	na	na	del	3	9-12	3	0	3	0	0	0	0	0	0	0	0	0	0	0	3-4	4	4-7
248	20	18-24	1	0	1	0	3	3-4	>=3	9	36-40	yes	na	na	3	0	4	0	0	1	1	0	1	1	1	0	1	1	3-4	7	4-7
252	31	25-31	1	1	1	1	3	3-4	>=3	8	32-40	yes	na	na	3	0	4	0	0	0	0	0	0	0	0	0	1	1	0-2	4	4-7
253	36	32-38	1	2	1	1	3	3-4	>=3	na	na	del	5	17-20	3	0	1	1	0	1	0	0	0	0	0	0	0	0	0-2	8	>=8
259	32	32-38	1	2	1	0	3	3-4	>=3	na	na	del	na	na	3	0	1	1	0	1	1	1	1	1	1	1	1	1	0-2	4	4-7
263	35	32-38	1	1	1	0	3	3-4	>=3	8	32-40	yes	na	na	3	1	na	0	0	1	1	1	1	1	0	1	1	1	0-2	9	>=8
268	39	39-45	1	1	1	1	3	3-4	>=3	8	32-40	yes	na	na	3	0	1	0	0	0	0	0	0	0	0	0	0	0	0-2	8	>=8
271	27	25-31	1	1	1	0	3	3-4	>=3	na	na	del	2	5-8	3	0	1	1	1	0	0	0	1	1	1	3	1	1	0-2	7	4-7
280	26	25-31	1	1	1	1	3	3-4	>=3	na	na	del	3	9-12	3	0	1	0	0	0	0	0	0	0	0	0	1	1	3-4	5	4-7
287	29	25-31	1	2	2	1	3	3-4	>=3	9	36-40	yes	na	na	3	0	3	0	0	0	0	0	0	0	1	0	1	1	3-4	4	4-7
290	36	32-38	1	0	1	1	3	3-4	>=3	9	36-40	yes	na	na	3	0	2	1	0	0	0	0	1	0	1	0	1	1	3-4	2	<4
291	30	25-31	1	2	1	0	3	3-4	>=3	na	na	del	4	13-16	3	1	na	0	0	0	0	0	0	0	0	1	1	1	0-2	3	<4
301	28	25-31	1	1	1	1	3	3-4	>=3	8	32-40	yes	na	na	3	0	3	0	0	0	0	0	0	0	0	1	1	1	0-2	1	<4
308	32	32-38	1	0	1	1	3	3-4	>=3	8	32-40	yes	na	na	3	0	3	1	0	0	0	0	0	0	0	0	0	0	0-2	4	4-7
311	30	25-31	1	1	1	1	3	3-4	>=3	9	36-40	yes	na	na	3	0	1	0	0	1	1	1	1	1	1	1	1	1	3-4	6	4-7
316	28	25-31	1	1	1	1	3	3-4	>=3	9	36-40	yes	na	na	3	0	1	0	0	0	0	0	0	0	0	0	0	0	0-2	6	4-7
317	41	39-45	1	0	1	1	3	3-4	>=3	8	32-40	yes	na	na	3	0	2	0	0	0	0	0	0	0	0	0	0	0	0-2	7	4-7
319	30	25-31	1	1	1	1	3	3-4	>=3	8	32-40	yes	na	na	3	0	1	0	0	0	0	0	0	0	0	0	0	0	0-2	6	4-7
323	32	32-38	1	1	1	1	3	3-4	>=3	8	32-40	yes	na	na	3	0	1	0	0	0	0	0	0	0	0	0	0	0	3-4	9	>=8
326	35	32-38	1	0	1	1	3	3-4	>=3	8	32-40	yes	na	na	3	0	3	0	0	0	0	0	0	0	0	0	0	0	0-2	7	4-7
331	27	25-31	1	0	1	1	3	3-4	>=3	na	na	del	2	5-8	3	0	1	1	0	1	1	1	1	1	1	1	1	1	0-2	8	>=8
334	32	32-38	1	1	1	1	3	3-4	>=3	na	na	del	3	9-12	3	0	2	1	0	0	0	0	0	0	0	0	1	1	3-4	8	>=8
336	28	25-31	1	3	0	0	3	3-4	>=3	na	na	del	4	13-16	3	0	3	0	0	0	0	0	0	0	0	1	1	1	0-2	6	4-7
343	35	32-38	1	1	1	1	3	3-4	>=3	na	na	del	2	5-8	3	0	2	0	0	0	1	1	1	0	0	1	1	1	0-2	8	>=8
349	34	32-38	1	3	0	1	3	3-4	>=3	8	32-40	yes	na	na	3	0	2	0	0	0	0	0	0	0	0	0	0	0	3-4	7	4-7
351	33	32-38	1	1	1	0	3	3-4	>=3	8	32-40	yes	na	na	3	0	3	0	0	0	0	0	0	0	0	0	0	0	0-2	6	4-7
360	30	25-31	1	0	1	1	3	3-4	>=3	8	32-40	yes	na	na	3	0	3	0	0	0	0	1	0	0	0	0	1	1	0-2	6	4-7
366	28	25-31	1	2	0	1	3	3-4	>=3	na	na	del	2	5-8	3	0	1	0	0	0	0	0	0	0	0	0	1	1	3-4	9	>=8
373	26	25-31	1	2	1	1	3	3-4	>=3	8	32-40	yes	na	na	0	0	3	1	0	0	0	0	0	0	1	0	1	0	3-4	9	>=8
377	27	25-31	1	0	2	1	3	3-4	>=3	9	36-40	yes	na	na	3	1	na	0	0	1	1	1	1	0	1	0	1	1	0-2	4	4-7
382	32	32-38	1	1	0	0	3	3-4	>=3	na	na	del	4	13-16	3	0	1	1	0	1	1	1	1	0	1	0	0	0	0-2	6	4-7
383	35	32-38	1	1	1	1	3	3-4	>=3	9	36-40	yes	na	na	3	0	4	0	0	0	0	0	0	0	0	0	0	0	3-4	8	>=8
22	34	32-38	1	1	1	0	4	3-4	>=3	9	36-40	yes	na	na	4	0	1	0	0	0	0	0	0	0	0	0	0	0	0-2	6	4-7
29	42	39-45	1	1	1	1	4	3-4	>=3	9	36-40	yes	na	na	4	0	3	0	0	0	0	0	0	0	0	0	1	1	3-4	4	4-7
46	29	25-31	1	1	1	1	4	3-4	>=3	9	36-40	yes	na	na	4	0	3	0	0	0	1	0	1	1	1	1	1	1	3-4	3	<4
51	40	39-45	1	0	1	1	4	3-4	>=3	9	36-40	yes	na	na	4	0	3	0	0	0	1	0	1	0	0	0	1	1	3-4	5	4-7
56	38	32-38	1	0	1	1	4	3-4	>=3	8	32-40	yes	na	na	4	0	3	0	0	0	1	0	1	0	0	0	0	0	3-4	7	4-7
75	31	25-31	1	1	1	1	4	3-4	>=3	na	na	del	4	13-16	4	0	3	0	0	0	0	0	0	0	0	0	0	0	3-4	6	4-7
106	38	32-38	1	1	1	0	4	3-4	>=3	na	na	del	1	1-4	4	0	4	0	0	0	0	0	0	0	0	0	0	0	0-2	6	4-7
107	29	25-31	1	1	1	1	4	3-4	>=3	na	na	del	1	1-4	4	0	4	0	0	0	1	0	0	0	0	0	0	0	3-4	4	4-7
113	45	39-45	1	2	1	1	4	3-4	>=3	na	na	del	6	21-24	4	1	na	1	0	0	0	0	0	0	0	0	0	0	3-4	7	4-7
123	45	39-45	1	2	0	0	4	3-4	>=3	na	na	del	4	13-16	0	0	3	0	0	0	0	0	0	0	0	0	0	0	0-2	7	4-7
165	32	32-38	1	1	1	1	4	3-4	>=3	na	na	del	3	9-12	4	0	1	0	0	0	1	0	1	0	0	0	0	0	0-2	2	<4
185	37	32-38	1	0	1	0	4	3-4	>=3	8	32-40	yes	na	na	4	0	1	0	0	0	0	0	0	0	0	0	0	0	0-2	4	4-7
197	33	32-38	1	1	2	0	4	3-4	>=3	9	36-40	yes	na	na	4	0	1	0	0	1	1	1	1	0	0	0	1	1	0-2	9	>=8
200	28	25-31	1	1	1	1	4	3-4	>=3	8	32-40	yes	na	na	4	0	3	0	0	1	1	1	1	0	0	0	0	0	3-4	5	4-7
203	32	32-38	1	1	1	1	4	3-4	>=3	9	36-40	yes	na	na	0	1	na	1	0	1	1	1	1	0	0	0	0	0	0-2	7	4-7
220	30	25-31	1	2	1	1	4	3-4	>=3	na	na	del	2	5-8	4	0	3	1	0	0	1	0	1	0	0	0	0	0	0-2	4	4-7
221	34	32-38	1	1	1	1	4	3-4	>=3	na	na	del	6	21-24	4	0	3	0	0	0	0	0	1	0	0	0	0	0	0-2	7	4-7
223	40	39-45	1	1	1	0	4	3-4	>=3	na	na	del	4	13-16	4	0	4	0	0	0	1	0	1	0	0	0	0	0	0-2	7	4-7
227	26	25-31	2	0	1	1	4	3-4	>=3	na	na	del	3	9-12	4	0	4	0	0	0	1	0	1	0	0	0	1	1	0-2	4	4-7
267	38	32-38	1	1	1	0	4	3-4	>=3	8	32-40	yes	na	na	4	0	1	0	0	0	0	0	0	0	0	0	0	0	0-2	1	<4
276	28	25-31	1	1	1	1	4	3-4	>=3	na	na	del	2	5-8	4	1	na	0	0	0	0	0	0	1	0	0	1	1	0-2	7	4-7
320	34	32-38	1	0	1	1	4	3-4	>=3	9	36-40	yes	na	na	4	0	3	0	0	0	1	1	0	0	0	0	0	0	0-2	7	4-7
330	30	25-31	1	3	1	1	4	3-4	>=3	na	na	del	1	1-4	4	1	na	1	0	0	0	0	0	0	0	0	0	0	0-2	6	4-7
341	29	25-31	0	1	1	1	4	3-4	>=3	na	na	del	1	1-4	4	0	4	1	0	0	0	0	0	1	1	1	1	1	0-2	6	4-7
364	35	32-38	1	2	2	0	4	3-4	>=3	na	na	del	1	1-4	4	1	na	0	0	0	0	0	0	0	0	1	1	0	0-2	7	4-7
376	38	32-38	1	0	1	1	4	3-4	>=3	9	36-40	yes	na	na	4	0	4	0	0	0	0	0	0	0	1	0	0	0	0-2	5	4-7
11	35	32-38	1	0	2	1	5	5-7	>=3	na	na	del	2	5-8	5	0	3	1	0	1	1	1	1	1	1	1	1	1	3-4	6	4-7
34	40	39-45	1	2	2	0	5	5-7	>=3	na	na	del	1	1-4	5	0	1	0	0	0	0	0	1	0	0	0	0	0	0-2	4	4-7
65	35	32-38	1	0	2	0	5	5-7	>=3	8	32-40	yes	na	na	5	0	2	0	0	0	1	1	1	0	1	0	1	1	0-2	3	<4
69	37	32-38	1	0	1	1	5	5-7	>=3	na	na	del	1	1-4	5	0	1	0	0	0	1	0	1	1	1	1	1	1	0-2	6	4-7
74	41	39-45	1	1	1	1	5	5-7	>=3	na	na	del	4	13-16	5	0	1	0	0	0	0	0	0	0	0	0	0	0	0-2	4	4-7
97	32	32-38	1	0	1	1	5	5-7	>=3	na	na	del	4	13-16	5	0	2	0	0	0	1	0	1	0	0	0	0	0	0-2	2	<4
141	40	39-45	1	1	1	1	5	5-7	>=3	9	36-40	yes	na	na	5	0	3	0	0	0	0	0	0	0	0	0	0	0	3-4	6	4-7
274	33	32-38	1	1	1	1	5	5-7	>=3	na	na	del	3	9-12	5	0	1	0	0	0	0	1	1	0	0	0	1	1	0-2	8	>=8
98	32	32-38	1	1	1	1	6	5-7	>=3	na	na	del	6	21-24	6	0	5	0	0	0	1	0	1	0	1	0	1	1	5-6	8	>=8
163	37	32-38	1	0	2	1	7	5-7	>=3	na	na	del	5	17-20	7	0	3	0	0	0	0	0	0	0	0	0	0	0	3-4	4	4-7
182	40	39-45	1	1	2	1	7	5-7	>=3	8	32-40	yes	na	na	7	0	4	0	0	0	0	0	0	0	0	0	0	0	3-4	4	4-7
